# Supplementary material for: Immobilized Bisphosphonates as Potential Inhibitors of Bioprosthetic Calcification: Effects on Various Xenogeneic Cardiovascular Tissues
Source: MDPI journal article supplement (doi:10.3390/biomedicines10010065), 2021-12-29
Supplement: s1 [file s1]

**IMMOBILIZED BISPHOSPHONATES AS POTENTIAL INHIBITORS  
OF BIOPROSTHETIC CALCIFICATION:  
EFFECT ON DIFFERENT XENOGENEIC CARDIOVASCULAR TISSUES**

Irina Y. Zhuravleva<sup>1</sup>, Anna A. Dokuchaeva<sup>1</sup>, Elena V. Karpova<sup>2</sup>, Tatyana P. Timchenko<sup>1</sup>, Anatoly T. Titov<sup>3</sup>, Svetlana S. Shatskaya<sup>4</sup>, Yuliya F. Polienko<sup>2</sup>

***S1. FTIR-spectroscopy results***

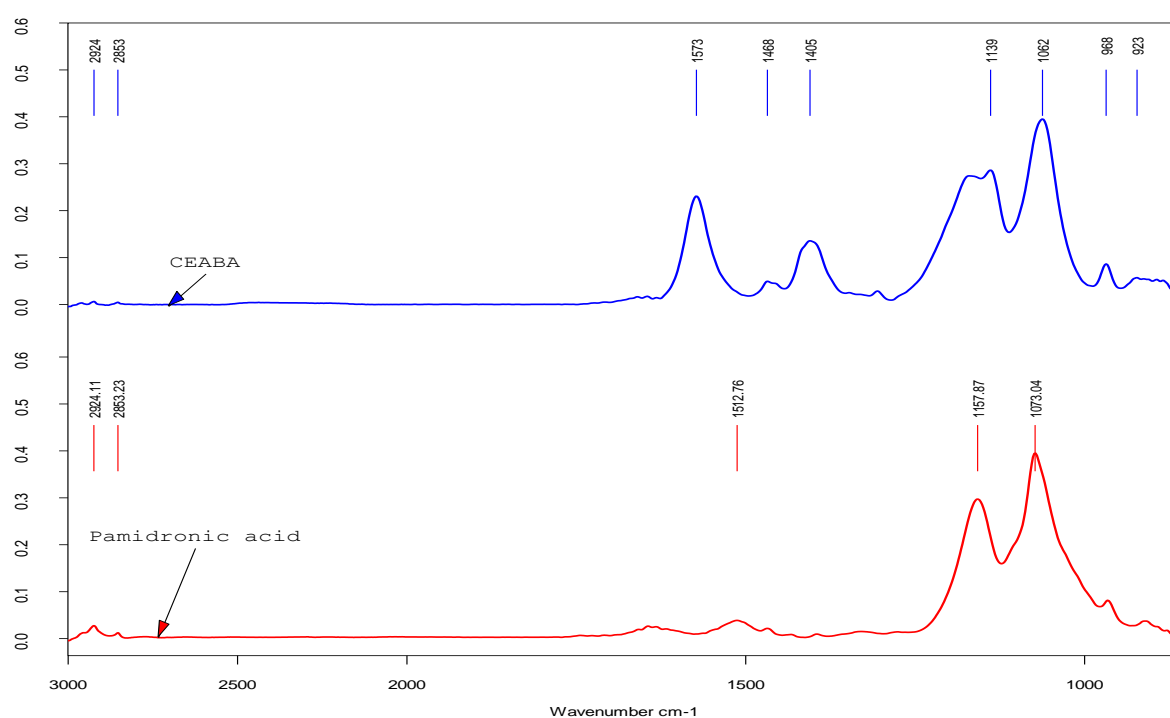

**Figure S1.** ATR-FTIR spectra of bisphosphonic acids solutions at pH 7

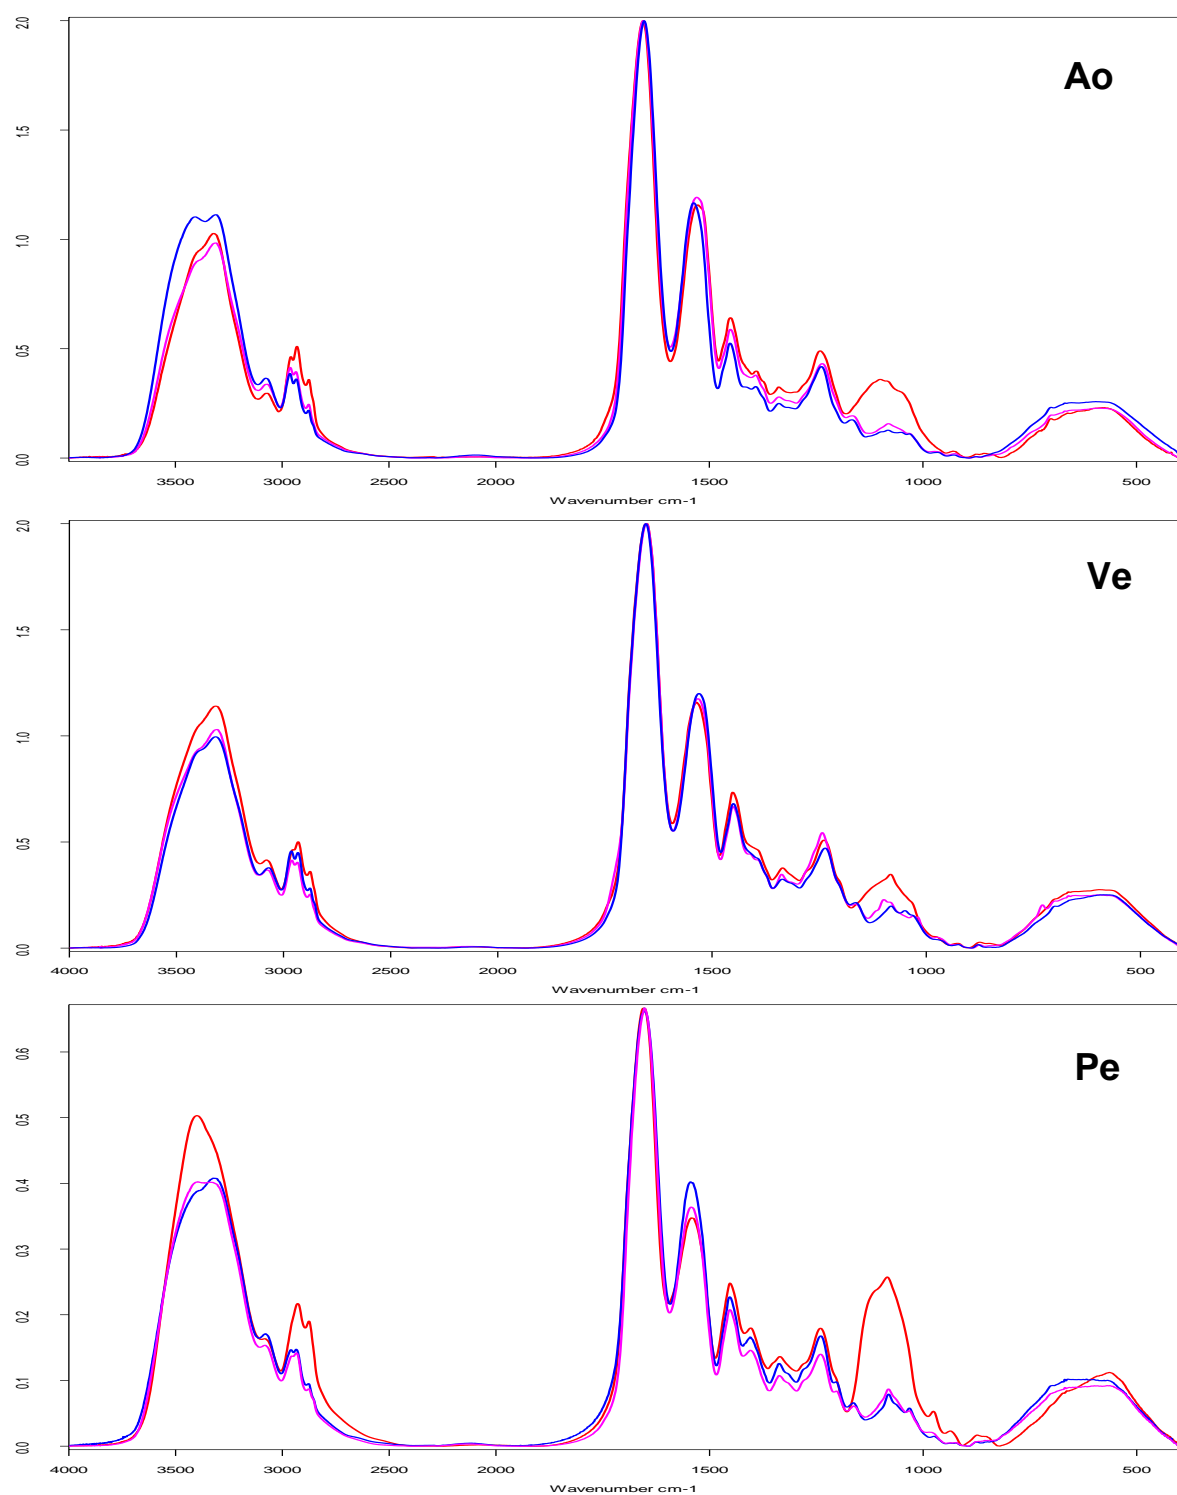

Figure S2. FTIR spectra of bioprosthetic materials: untreated (blue lines), cross-linked with GA (pink lines) or DE (red lines).

***S2. SEM of the sample surfaces at different times after the implantation***

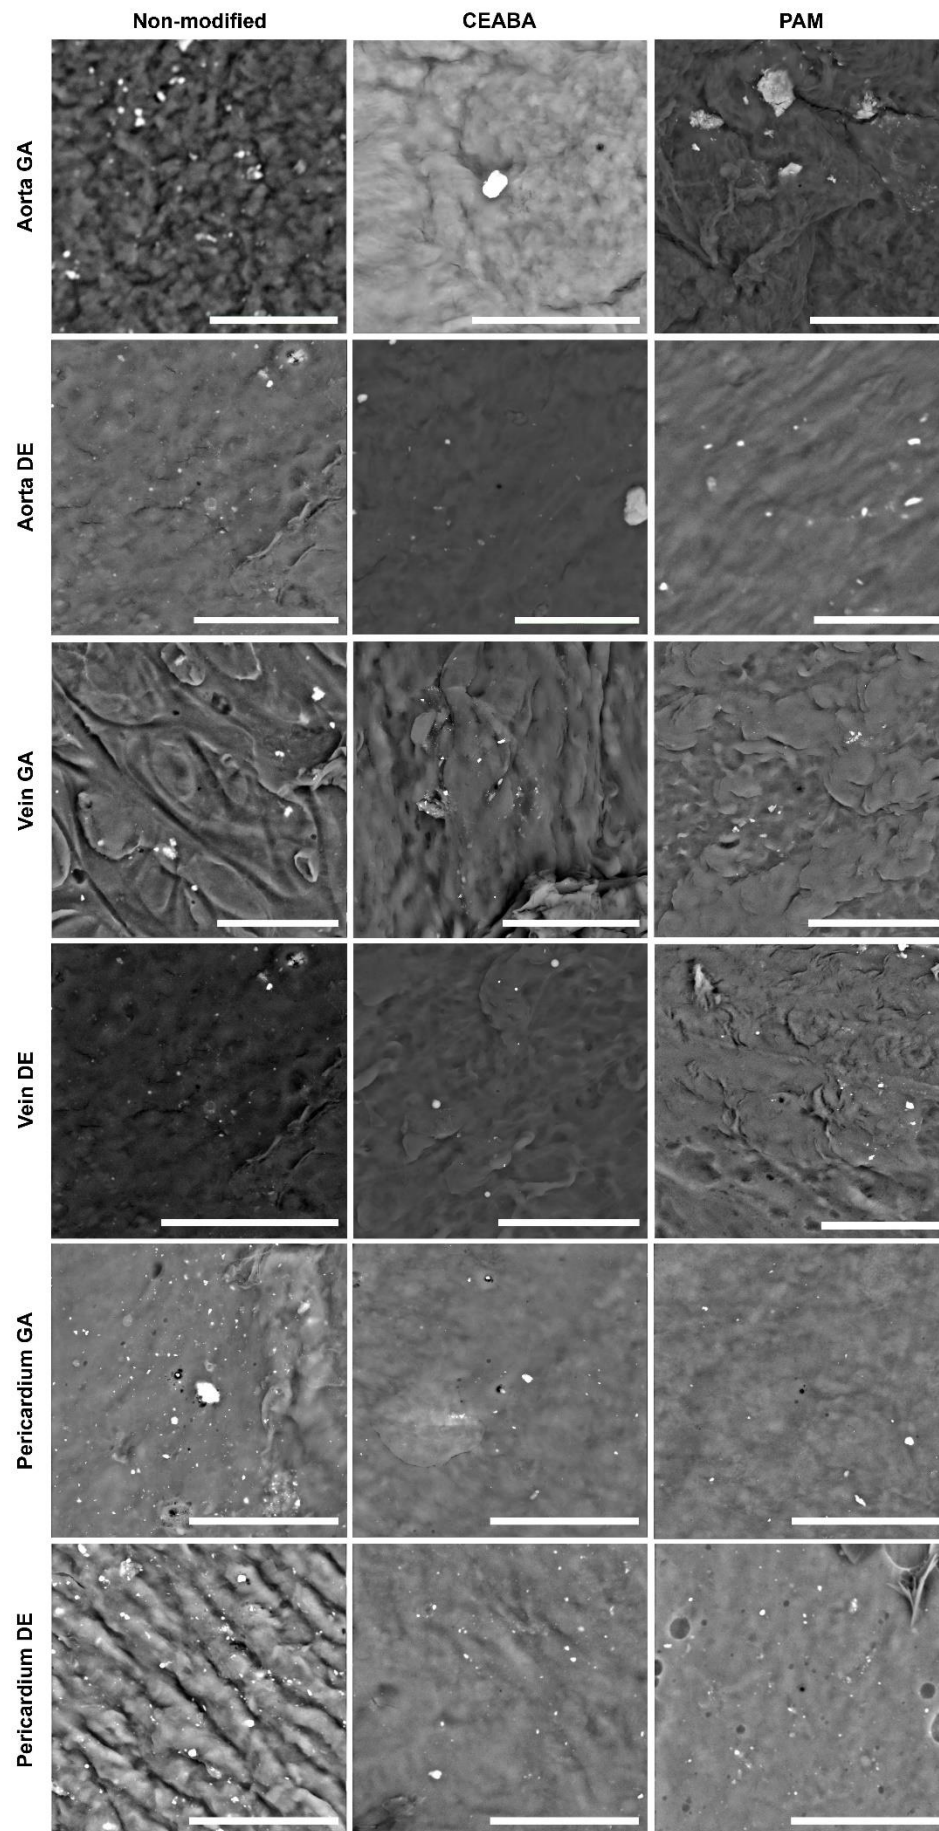

**Figure S3.** SEM (back-scattering electron) of the bioprosthetic material surfaces in 10 days after subcutaneous implantation in rats. Scale bars 50  $\mu\text{m}$ .

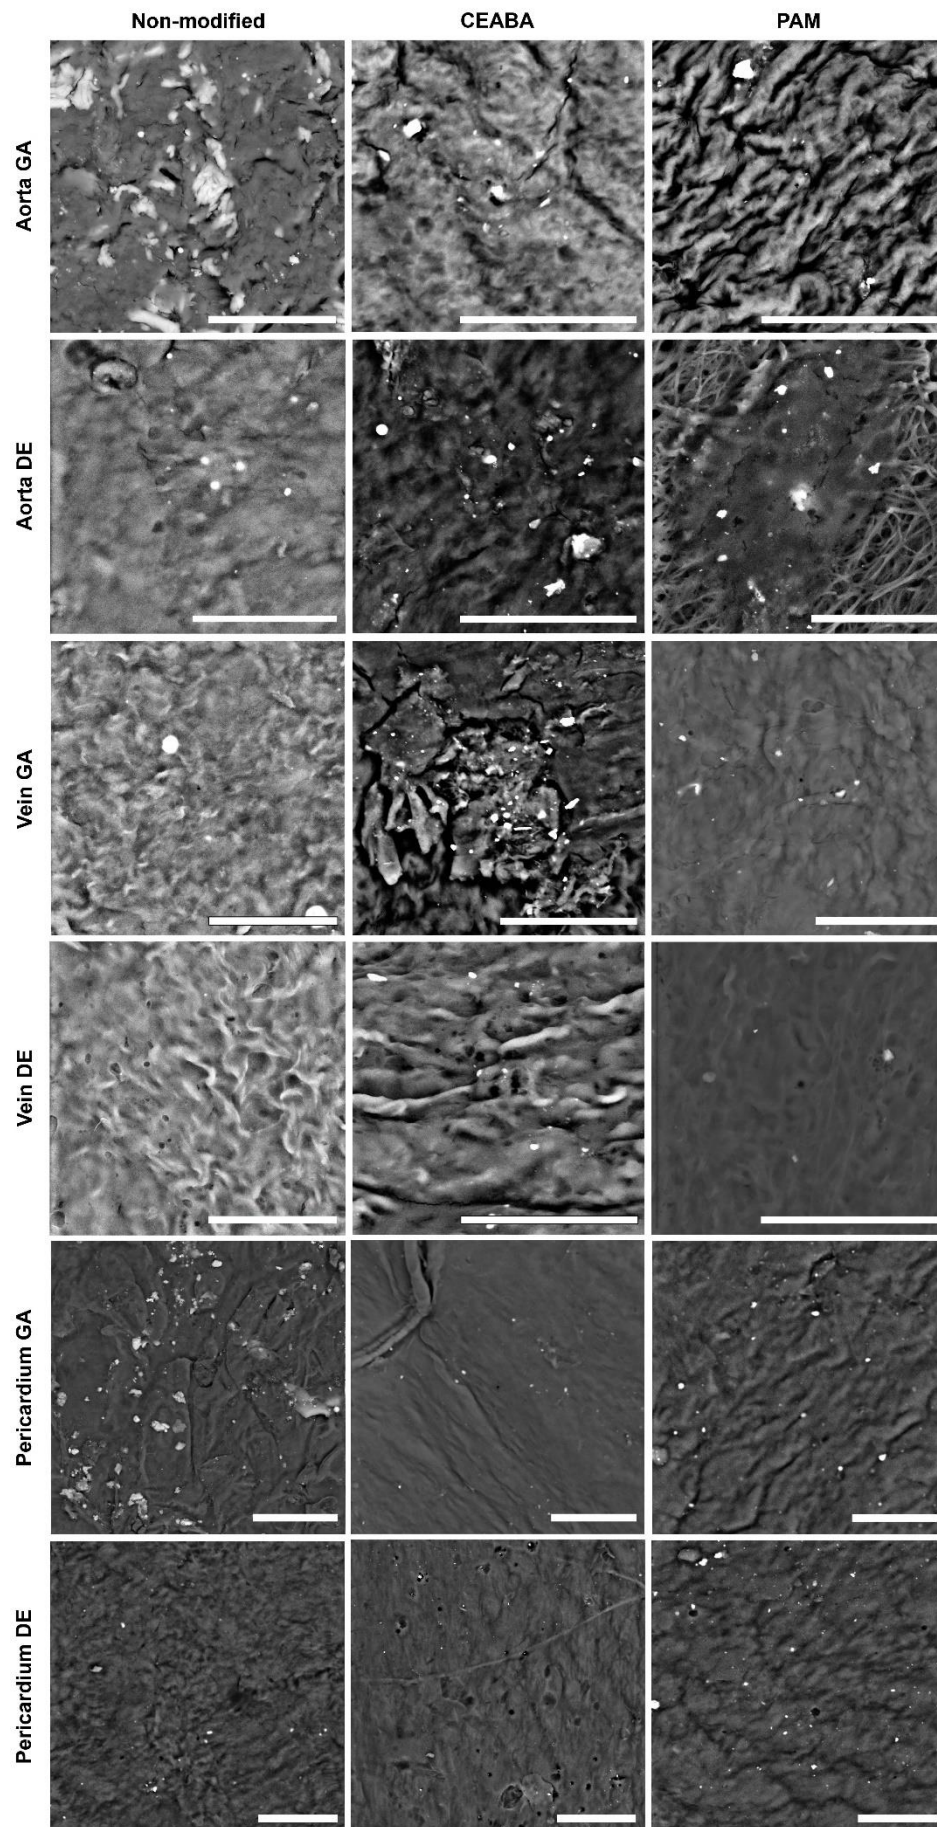

**Figure S4.** SEM (back-scattering electron) of the bioprosthetic material surfaces in 20 days after subcutaneous implantation in rats. Scale bars 50  $\mu\text{m}$ .



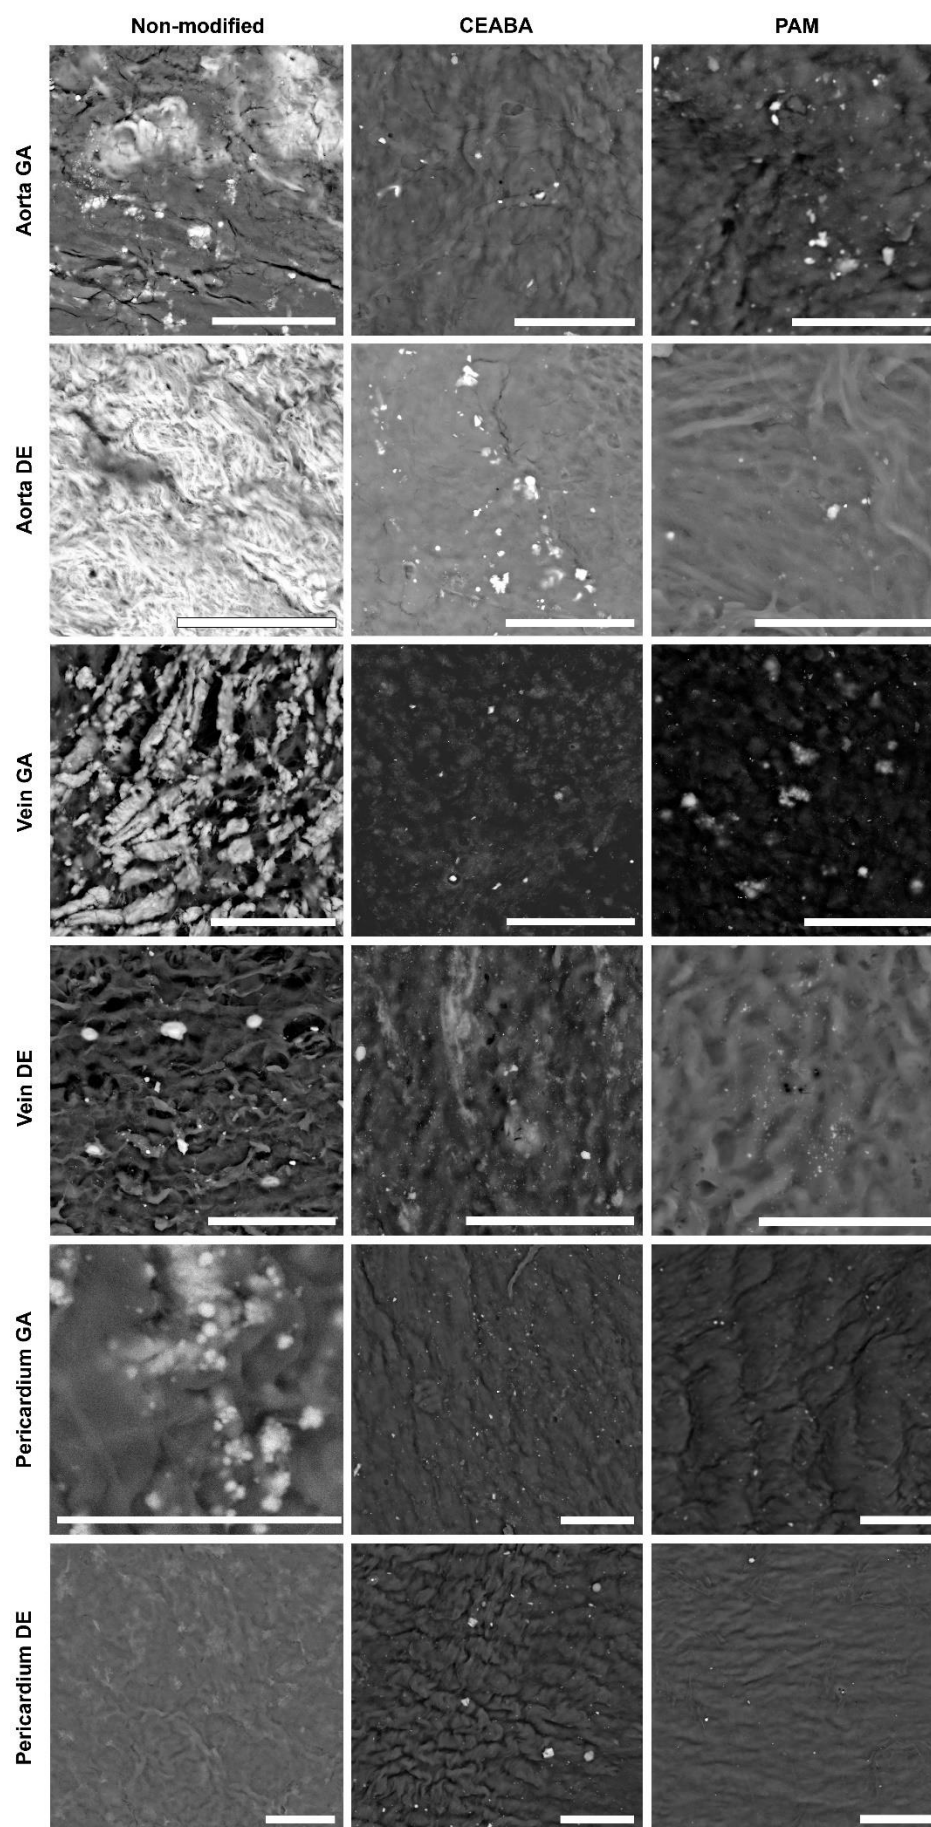

**Figure S5.** SEM (back-scattering electron) of the bioprosthetic material surfaces in 30 days after subcutaneous implantation in rats. Scale bars 50  $\mu\text{m}$ .
